# Supplementary material for: Maternal One-Carbon Nutrient Intake and Risk of Being Overweight or Obese in Their Offspring—A Transgenerational Prospective Cohort Study
Source: MDPI journal article supplement (doi:10.3390/nu16081210), 2024-04-19
Supplement: s1 [file s1]

**Supplemental Material to Bogl and Strohmaier et al. Maternal one-carbon nutrient intake and offspring overweight and obesity in their  
offspring – A transgenerational prospective cohort study**

**Supplementary Table S1. Adjusted mean differences (MD) and 95 % confidence intervals (95% CI) in offspring birth weight (gram) according to quintiles of maternal one-carbon nutrient intake during the period surrounding pregnancy among the n=1,982 offspring with information on birth weight**

|                                  | Quintiles of maternal one-carbon nutrient intake |                       |                     |                     |                     | P for trend |
|----------------------------------|--------------------------------------------------|-----------------------|---------------------|---------------------|---------------------|-------------|
|                                  | 1                                                | 2                     | 3                   | 4                   | 5                   |             |
| <b>Total folate</b>              |                                                  |                       |                     |                     |                     |             |
| Participants                     | 392                                              | 399                   | 403                 | 400                 | 388                 |             |
| Basic model, MD (95 % CI)        | 0 (ref)                                          | -29.3 (-95.4, 36.8)   | -18.4 (-84.2, 47.4) | 33.5 (-32.5, 99.5)  | -3.1 (-69.6, 63.4)  | 0.41        |
| Multivariate model, MD (95 % CI) | 0 (ref)                                          | -23.9 (-92.0, 44.2)   | -10.5 (-78.3, 57.3) | 49.8 (-18.8, 118.4) | 13.2 (-56.7, 83.1)  | 0.18        |
| <b>Total vitamin B12</b>         |                                                  |                       |                     |                     |                     |             |
| Participants                     | 447                                              | 431                   | 371                 | 370                 | 363                 |             |
| Basic model, MD (95 % CI)        | 0 (ref)                                          | -17.2 (-79.9, 45.5)   | -21.3 (-86.5, 43.9) | 1.3 (-64.0, 66.5)   | 39.7 (-25.9, 105.3) | 0.16        |
| Multivariate model, MD (95 % CI) | 0 (ref)                                          | -20.8 (-84.2, 42.7)   | -17.5 (-84.2, 49.1) | 2.2 (-64.6, 69.0)   | 48.4 (-19.4, 116.2) | 0.09        |
| <b>Total vitamin B6</b>          |                                                  |                       |                     |                     |                     |             |
| Participants                     | 402                                              | 404                   | 394                 | 401                 | 381                 |             |
| Basic model, MD (95 % CI)        | 0 (ref)                                          | -8.0 (-73.4, 1, 57.4) | 25.3 (-40.5, 91.1)  | 52.2 (-13.4, 117.7) | 32.6 (-33.8, 98.9)  | 0.21        |
| Multivariate model, MD (95 % CI) | 0 (ref)                                          | 2.6 (-64.6, 69.9)     | 36.6 (-31.0, 104.2) | 71.9 (4.2, 139.6)   | 46.4 (-22.0, 114.8) | 0.14        |
| <b>Total vitamin B2</b>          |                                                  |                       |                     |                     |                     |             |
| Participants                     | 396                                              | 396                   | 407                 | 392                 | 391                 |             |
| Basic model, MD (95 % CI)        | 0 (ref)                                          | -54.5 (-120.4, 11.4)  | 15.0 (-50.4, 80.5)  | 41.6 (-24.5, 107.6) | 25.7 (-40.4, 91.8)  | 0.06        |
| Multivariate model, MD (95 % CI) | 0 (ref)                                          | -59.4 (-126.4, 7.6)   | 21.0 (-46.3, 88.3)  | 57.0 (-11.3, 125.3) | 38.9 (-30.1, 107.9) | 0.02        |
| <b>Total methionine</b>          |                                                  |                       |                     |                     |                     |             |
| Participants                     | 396                                              | 383                   | 417                 | 390                 | 396                 |             |
| Basic model, MD (95 % CI)        | 0 (ref)                                          | 49.0 (-17.7, 115.6)   | 23.1 (-42.2, 88.2)  | 7.0 (-59.2, 73.2)   | 49.5 (-16.5, 115.4) | 0.35        |
| Multivariate model, MD (95 % CI) | 0 (ref)                                          | 40.3 (-27.2, 107.8)   | 13.6 (-52.7, 79.9)  | -4.0 (-71.5, 63.6)  | 36.4 (-32.2, 105.0) | 0.60        |
| <b>Total choline</b>             |                                                  |                       |                     |                     |                     |             |
| Participants                     | 399                                              | 396                   | 396                 | 398                 | 393                 |             |
| Basic model, MD (95 % CI)        | 0 (ref)                                          | 84.6 (18.8, 150.3)    | 28.0 (-37.7, 93.6)  | 71.2 (5.5, 136.9)   | 108.3 (42.4, 174.1) | 0.005       |

|                                  |         |                     |                    |                    |                      |       |
|----------------------------------|---------|---------------------|--------------------|--------------------|----------------------|-------|
| Multivariate model, MD (95 % CI) | 0 (ref) | 81.7 (15.3, 148.1)  | 32.1 (-34.9, 99.1) | 66.6 (-1.0, 134.1) | 116.0 (47.1, 184.9)  | 0.004 |
| <b>Phosphatidylcholine</b>       |         |                     |                    |                    |                      |       |
| Participants                     | 400     | 401                 | 392                | 395                | 394                  |       |
| Basic model, MD (95 % CI)        | 0 (ref) | -31.4 (-97.0, 34.2) | -4.1 (-70.0, 61.9) | 10.9 (-54.9, 76.7) | 28.0 (-37.9, 93.9)   | 0.20  |
| Multivariate model, MD (95 % CI) | 0 (ref) | -29.0 (-95.1, 37.2) | -4.6 (-71.8, 62.7) | -0.9 (-67.9, 66.1) | 17.2 (-50.2, 84.7)   | 0.42  |
| <b>Total betaine</b>             |         |                     |                    |                    |                      |       |
| Participants                     | 381     | 403                 | 400                | 409                | 389                  |       |
| Basic model, MD (95 % CI)        | 0 (ref) | -9.1 (-75.8, 57.5)  | 22.3 (-44.4, 88.9) | 2.7 (-63.9, 69.2)  | -37.9 (-105.4, 29.6) | 0.27  |
| Multivariate model, MD (95 % CI) | 0 (ref) | -14.5 (-82.4, 53.4) | 27.5 (-40.9, 96.0) | 17.5 (-51.8, 86.8) | -12.6 (-83.2, 58.1)  | 0.87  |

Basic models are adjusted for offspring sex (boy/girl) and maternal age at birth of the child (continuous).

Multivariable adjusted models are additionally adjusted for BMI before pregnancy (< 18.5, 18.5 < 25, 25-29, ≥ 30 kg/m<sup>2</sup>), smoking status before pregnancy (never, current, past), alcohol intake (g/d: 0, 1–14, or ≥ 15), physical activity (0, 1-149, 150 -299, ≥ 300 min/week of moderate to vigorous intensity), total energy intake (continuous), parity (nulliparous, 1, 2, 3+ previous pregnancies), partner's education (less than 2yr college, 4yr college, graduate school), marital status (yes/no), sugar sweetened beverages (servings/day in categories), refined grains (servings/day in categories), coffee (cups/day in quintiles), ratio of polyunsaturated to saturated fat (quintiles) and trans fat (grams per day in quintiles).

**Supplemental Table S2: Relative risks (RR) for larger than median body size at age 5 according to quintiles of maternal one-carbon nutrient intake during the period surrounding pregnancy among the n=2,364 offspring with information on body size.**

| during the period surrounding pregnancy among the 11,250 women with information on body size. |                                                  |                   |                   |                   |                   |             |
|-----------------------------------------------------------------------------------------------|--------------------------------------------------|-------------------|-------------------|-------------------|-------------------|-------------|
|                                                                                               | Quintiles of maternal one-carbon nutrient intake |                   |                   |                   |                   | P for trend |
|                                                                                               | 1                                                | 2                 | 3                 | 4                 | 5                 |             |
| <b>Total folate</b>                                                                           |                                                  |                   |                   |                   |                   |             |
| Cases/participants                                                                            | 186/474                                          | 190/474           | 195/475           | 198/475           | 185/466           |             |
| Basic model                                                                                   | 1 (ref)                                          | 1.03 (0.88, 1.20) | 1.05 (0.90, 1.23) | 1.06 (0.91, 1.24) | 1.02 (0.87, 1.19) | 0.76        |
| Multivariate model                                                                            | 1 (ref)                                          | 1.06 (0.91, 1.25) | 1.10 (0.94, 1.29) | 1.10 (0.94, 1.29) | 1.05 (0.89, 1.24) | 0.55        |
| <b>Total vitamin B12</b>                                                                      |                                                  |                   |                   |                   |                   |             |
| Cases/participants                                                                            | 203/517                                          | 214/520           | 184/436           | 171/437           | 182/454           |             |
| Basic model                                                                                   | 1 (ref)                                          | 1.06 (0.92, 1.23) | 1.09 (0.93, 1.27) | 1.01 (0.86, 1.18) | 1.03 (0.88, 1.20) | 0.99        |
| Multivariate model                                                                            | 1 (ref)                                          | 1.07 (0.93, 1.25) | 1.10 (0.94, 1.29) | 1.01 (0.86, 1.18) | 1.04 (0.89, 1.22) | 0.96        |
| <b>Total vitamin B6</b>                                                                       |                                                  |                   |                   |                   |                   |             |
| Cases/participants                                                                            | 188/477                                          | 204/486           | 176/466           | 196/469           | 190/466           |             |
| Basic model                                                                                   | 1 (ref)                                          | 1.07 (0.92, 1.24) | 0.96 (0.82, 1.13) | 1.07 (0.91, 1.24) | 1.04 (0.89, 1.22) | 0.69        |
| Multivariate model                                                                            | 1 (ref)                                          | 1.11 (0.95, 1.30) | 1.00 (0.85, 1.18) | 1.09 (0.93, 1.27) | 1.07 (0.91, 1.26) | 0.60        |
| <b>Total vitamin B2</b>                                                                       |                                                  |                   |                   |                   |                   |             |
| Cases/participants                                                                            | 188/471                                          | 189/475           | 194/477           | 202/472           | 181/469           |             |
| Basic model                                                                                   | 1 (ref)                                          | 1.01 (0.87, 1.18) | 1.02 (0.87, 1.19) | 1.08 (0.93, 1.26) | 0.97 (0.83, 1.14) | 0.90        |
| Multivariate model                                                                            | 1 (ref)                                          | 1.02 (0.87, 1.19) | 1.04 (0.89, 1.22) | 1.09 (0.93, 1.27) | 0.99 (0.84, 1.17) | 0.88        |
| <b>Total methionine</b>                                                                       |                                                  |                   |                   |                   |                   |             |
| Cases/participants                                                                            | 202/471                                          | 183/459           | 193/476           | 197/486           | 179/472           |             |
| Basic model                                                                                   | 1 (ref)                                          | 0.94 (0.81, 1.10) | 0.96 (0.83, 1.11) | 0.95 (0.82, 1.10) | 0.88 (0.76, 1.03) | 0.15        |
| Multivariate model                                                                            | 1 (ref)                                          | 0.92 (0.79, 1.07) | 0.93 (0.80, 1.08) | 0.93 (0.80, 1.08) | 0.85 (0.73, 1.00) | 0.08        |
| <b>Total choline</b>                                                                          |                                                  |                   |                   |                   |                   |             |
| Cases/participants                                                                            | 182/467                                          | 195/476           | 207/473           | 192/473           | 178/475           |             |
| Basic model                                                                                   | 1 (ref)                                          | 1.07 (0.92, 1.25) | 1.12 (0.96, 1.30) | 1.05 (0.90, 1.23) | 0.97 (0.82, 1.14) | 0.64        |
| Multivariate model                                                                            | 1 (ref)                                          | 1.06 (0.92, 1.25) | 1.11 (0.95, 1.30) | 1.05 (0.89, 1.23) | 0.96 (0.81, 1.13) | 0.60        |
| <b>Phosphatidylcholine</b>                                                                    |                                                  |                   |                   |                   |                   |             |
| Participants                                                                                  | 179/467                                          | 193/471           | 195/480           | 194/476           | 193/470           |             |
| Basic model                                                                                   | 1 (ref)                                          | 1.07 (0.91, 1.25) | 1.06 (0.91, 1.24) | 1.07 (0.91, 1.25) | 1.08 (0.92, 1.26) | 0.40        |
| Multivariate model                                                                            | 1 (ref)                                          | 1.05 (0.90, 1.23) | 1.05 (0.90, 1.23) | 1.05 (0.90, 1.24) | 1.05 (0.90, 1.24) | 0.56        |
| <b>Total betaine</b>                                                                          |                                                  |                   |                   |                   |                   |             |
| Cases/participants                                                                            | 188/475                                          | 196/474           | 207/473           | 190/472           | 173/470           |             |
| Basic model                                                                                   | 1 (ref)                                          | 1.05 (0.90, 1.22) | 1.10 (0.95, 1.28) | 1.01 (0.87, 1.18) | 0.93 (0.79, 1.10) | 0.21        |
| Multivariate model                                                                            | 1 (ref)                                          | 1.07 (0.92, 1.25) | 1.13 (0.97, 1.32) | 1.05 (0.90, 1.23) | 0.97 (0.82, 1.15) | 0.45        |

Basic models are adjusted for offspring sex (boy/girl) and maternal age at birth of the child (continuous).

Multivariable adjusted models are additionally adjusted for BMI before pregnancy ( $< 18.5$ ,  $18.5 < 25$ ,  $25-29$ ,  $\geq 30$  kg/m<sup>2</sup>), smoking status before pregnancy (never, current, past), alcohol intake (g/d: 0, 1–14, or  $\geq 15$ ), physical activity (0, 1–149, 150–299,  $\geq 300$  min/week of moderate to vigorous intensity), total energy intake (continuous), parity (nulliparous, 1, 2, 3+ previous pregnancies), partner's education (less than 2yr college, 4yr college, graduate school), marital status (yes/no), sugar sweetened beverages (servings/day in categories), refined grains (servings/day in categories), coffee (cups/day in quintiles), ratio of polyunsaturated to saturated fat (quintiles) and trans fat (grams per day in quintiles).

**Supplemental Table S3. Relative risks and 95% confidence intervals for offspring ever having overweight or obesity during follow-up according to quintiles of maternal one-carbon nutrient intake during pregnancy among n=896 mother child pairs**

|                            | Quintile of maternal one-carbon nutrient intake |                   |                   |                   |                   | P for trend |
|----------------------------|-------------------------------------------------|-------------------|-------------------|-------------------|-------------------|-------------|
|                            | 1                                               | 2                 | 3                 | 4                 | 5                 |             |
| <b>Total folate</b>        |                                                 |                   |                   |                   |                   |             |
| Median intake (µg/d)       | 409                                             | 762               | 1000              | 1206              | 1531              |             |
| Cases/participants         | 92/178                                          | 84/179            | 81/180            | 87/179            | 83/180            |             |
| Basic model                | 1 (ref)                                         | 0.91 (0.74, 1.13) | 0.87 (0.70, 1.08) | 0.93 (0.76, 1.14) | 0.91 (0.74, 1.13) | 0.56        |
| Multivariate model         | 1 (ref)                                         | 0.88 (0.72, 1.09) | 0.86 (0.69, 1.07) | 0.92 (0.75, 1.13) | 0.90 (0.72, 1.12) | 0.52        |
| <b>Total vitamin B12</b>   |                                                 |                   |                   |                   |                   |             |
| Median intake (µg/d)       | 7                                               | 9                 | 13                | 16                | 21                |             |
| Cases/participants         | 97/197                                          | 66/132            | 99/218            | 89/187            | 76/162            |             |
| Basic model                | 1 (ref)                                         | 1.04 (0.83, 1.29) | 0.94 (0.76, 1.15) | 0.98 (0.80, 1.20) | 0.97 (0.78, 1.21) | 0.71        |
| Multivariate model         | 1 (ref)                                         | 1.12 (0.90, 1.40) | 0.98 (0.80, 1.19) | 0.99 (0.81, 1.21) | 1.00 (0.80, 1.25) | 0.74        |
| <b>Total vitamin B6</b>    |                                                 |                   |                   |                   |                   |             |
| Median intake (mg/d)       | 2.7                                             | 4.4               | 5.7               | 9.8               | 15.5              |             |
| Cases/participants         | 94/176                                          | 82/183            | 81/179            | 81/179            | 89/179            |             |
| Basic model                | 1 (ref)                                         | 0.84 (0.68, 1.04) | 0.84 (0.68, 1.05) | 0.86 (0.69, 1.06) | 0.95 (0.77, 1.16) | 0.79        |
| Multivariate model         | 1 (ref)                                         | 0.83 (0.68, 1.03) | 0.83 (0.67, 1.02) | 0.84 (0.68, 1.04) | 0.92 (0.75, 1.13) | 0.98        |
| <b>Total vitamin B2</b>    |                                                 |                   |                   |                   |                   |             |
| Median intake (mg/d)       | 2.4                                             | 3.6               | 4.2               | 4.9               | 6.2               |             |
| Cases/participants         | 84/175                                          | 92/182            | 89/180            | 76/180            | 86/179            |             |
| Basic model                | 1 (ref)                                         | 1.06 (0.86, 1.30) | 1.04 (0.84, 1.28) | 0.89 (0.71, 1.12) | 1.01 (0.82, 1.26) | 0.65        |
| Multivariate model         | 1 (ref)                                         | 1.05 (0.86, 1.29) | 1.03 (0.84, 1.27) | 0.91 (0.72, 1.14) | 1.04 (0.83, 1.30) | 0.89        |
| <b>Total methionine</b>    |                                                 |                   |                   |                   |                   |             |
| Median intake (g/d)        | 1.6                                             | 1.9               | 2.1               | 2.2               | 2.5               |             |
| Cases/participants         | 76/180                                          | 80/172            | 91/187            | 93/181            | 87/176            |             |
| Basic model                | 1 (ref)                                         | 1.11 (0.88, 1.39) | 1.16 (0.93, 1.45) | 1.21 (0.97, 1.51) | 1.17 (0.93, 1.46) | 0.12        |
| Multivariate model         | 1 (ref)                                         | 1.16 (0.93, 1.46) | 1.23 (0.99, 1.52) | 1.30 (1.05, 1.61) | 1.18 (0.94, 1.48) | 0.09        |
| <b>Total choline</b>       |                                                 |                   |                   |                   |                   |             |
| Median intake (mg/d)       | 267                                             | 310               | 339               | 367               | 404               |             |
| Cases/participants         | 79/178                                          | 89/181            | 83/179            | 91/180            | 85/178            |             |
| Basic model                | 1 (ref)                                         | 1.13 (0.91, 1.41) | 1.05 (0.84, 1.32) | 1.15 (0.92, 1.43) | 1.09 (0.87, 1.36) | 0.46        |
| Multivariate model         | 1 (ref)                                         | 1.18 (0.95, 1.46) | 1.11 (0.89, 1.39) | 1.23 (0.99, 1.53) | 1.14 (0.90, 1.43) | 0.23        |
| <b>Phosphatidylcholine</b> |                                                 |                   |                   |                   |                   |             |
| Median intake (mg/d)       | 115                                             | 138               | 157               | 175               | 207               |             |

|                      |         |                   |                   |                   |                   |      |
|----------------------|---------|-------------------|-------------------|-------------------|-------------------|------|
| Cases/participants   | 76/179  | 86/180            | 79/180            | 92/180            | 94/177            |      |
| Basic model          | 1 (ref) | 1.12 (0.89, 1.40) | 1.04 (0.82, 1.31) | 1.21 (0.97, 1.50) | 1.26 (1.01, 1.57) | 0.03 |
| Multivariate model   | 1 (ref) | 1.16 (0.93, 1.45) | 1.05 (0.83, 1.32) | 1.24 (1.00, 1.54) | 1.18 (0.95, 1.46) | 0.10 |
| <b>Total betaine</b> |         |                   |                   |                   |                   |      |
| Median intake (mg/d) | 72      | 92                | 110               | 129               | 170               |      |
| Cases/participants   | 85/180  | 83/180            | 88/179            | 91/178            | 80/179            |      |
| Basic model          | 1 (ref) | 0.98 (0.78, 1.22) | 1.04 (0.84, 1.29) | 1.08 (0.88, 1.34) | 0.95 (0.76, 1.19) | 0.83 |
| Multivariate model   | 1 (ref) | 1.02 (0.82, 1.27) | 1.13 (0.91, 1.40) | 1.24 (1.00, 1.53) | 1.05 (0.83, 1.32) | 0.52 |

---

Basic models are adjusted for offspring sex (boy/girl), maternal age at birth of the child (continuous) and gestational age (28 - 36, 37 - 41,  $\geq 42$  wks). Multivariable adjusted models are additionally adjusted for BMI before pregnancy ( $< 18.5$ ,  $18.5 < 25$ ,  $25-29$ ,  $\geq 30$  kg/m<sup>2</sup>), smoking status before pregnancy (never, current, past), alcohol intake (g/d: 0, 1–14, or  $\geq 15$ ), physical activity (0, 1-149, 150 -299,  $\geq 300$  min/week of moderate to vigorous intensity), total energy intake (continuous), parity (nulliparous, 1, 2, 3+ previous pregnancies), partner's education (less than 2yr college, 4yr college, graduate school), marital status (yes/no), sugar sweetened beverages (servings/day in categories), refined grains (servings/day in categories), coffee (cups/day in quintiles), ratio of polyunsaturated to saturated fat (quintiles) and trans fat (grams per day in quintiles).
